# Supplementary material for: Effectiveness of modifications to preadjusted appliance prescriptions based on racial dental characteristics assessed by the ABO Cast-Radiograph Evaluation: A propensity score matching study
Source: PeerJ. 2021 Jan 15;9:e10605. doi: 10.7717/peerj.10605 (PMC7812923; doi:10.7717/peerj.10605)
Supplement: Supplemental Information 2 [file peerj-09-10605-s002.xlsx]

## Sheet: Sheet1
ID	Group(1=Chinese,2=Roth)	anterior Bolton index	total Bolton index
1	1	0.765	0.901
2	1	0.787	0.92			Mean group1
3	1	0.802	0.92			Mean group2
4	1	0.815	0.924
5	1	0.812	0.921
6	1	0.806	0.923
7	1	0.786	0.912
8	1	0.778	0.908
9	1	0.769	0.896
10	1	0.787	0.907
11	1	0.792	0.92
12	1	0.802	0.903
13	1	0.809	0.915
14	1	0.81	0.93
15	1	0.78	0.905
16	1	0.824	0.926
17	1	0.801	0.928
18	1	0.796	0.92
19	1	0.788	0.916
20	1	0.798	0.924
21	1	0.786	0.915
22	1	0.779	0.91
23	1	0.788	0.913
24	1	0.806	0.924
25	1	0.794	0.92
26	1	0.774	0.906
27	1	0.804	0.925
28	1	0.788	0.91
29	1	0.778	0.904
30	1	0.806	0.928
31	2	0.776	0.909
32	2	0.776	0.899
33	2	0.804	0.922
34	2	0.804	0.91
35	2	0.79	0.925
36	2	0.77	0.91
37	2	0.77	0.907
38	2	0.802	0.92
39	2	0.806	0.915
40	2	0.782	0.926
41	2	0.788	0.928
42	2	0.792	0.922
43	2	0.772	0.912
44	2	0.813	0.915
45	2	0.786	0.903
46	2	0.801	0.93
47	2	0.802	0.903
48	2	0.786	0.928
49	2	0.796	0.92
50	2	0.795	0.91
51	2	0.81	0.924
52	2	0.808	0.915
53	2	0.776	0.91
54	2	0.806	0.912
55	2	0.788	0.918
56	2	0.782	0.905
57	2	0.804	0.926
58	2	0.766	0.905
59	2	0.793	0.912
60	2	0.786	0.91
