# Supplementary material for: Effectiveness of modifications to preadjusted appliance prescriptions based on racial dental characteristics assessed by the ABO Cast-Radiograph Evaluation: A propensity score matching study
Source: PeerJ. 2021 Jan 15;9:e10605. doi: 10.7717/peerj.10605 (PMC7812923; doi:10.7717/peerj.10605)
Supplement: Supplemental Information 3 [file peerj-09-10605-s003.xlsx]

## Sheet: Sheet1
ID	Group（1=Chinese,2=Roth）	alignment	marginal ridge	torque	overjet	occlusal contact	occlusal relationship	space	root parallel	ABO total	U1(upper central incisor)	U2	U3	U4	U5	U6	U7	L1(Lower central incisor)	L2	L3	L4	L5	L6	L7
1	1	7	3	7	6	3	2	0	2	30	1	0	0	2	0	0	1	0	1	0	1	0	1	1
2	1	6	0	3	6	5	10	0	1	31	0	0	0	0	1	1	1	0	1	0	0	0	1	0
3	1	4	3	4	8	5	2	0	1	27	0	0	1	0	0	1	1	0	0	0	0	0	0	0
4	1	8	5	4	1	0	10	0	0	28	0	2	0	2	0	0	0	0	1	0	0	0	1	2
5	1	3	5	3	1	5	2	0	1	20	0	0	0	1	1	0	0	0	0	0	0	0	1	0
6	1	4	8	3	2	0	0	0	1	18	0	0	0	1	1	0	0	0	0	0	1	0	1	0
7	1	6	3	5	3	1	1	0	1	20	0	0	0	2	0	0	0	0	0	0	0	0	4	1
8	1	5	7	4	0	3	2	0	0	21	0	0	0	1	2	0	0	0	0	0	0	0	2	0
9	1	2	3	1	3	3	1	0	0	13	0	0	0	1	0	0	1	0	0	0	0	0	2	0
10	1	5	3	5	1	1	5	0	0	20	0	0	0	0	0	0	1	0	0	1	0	1	1	0
11	1	3	3	4	6	7	0	0	2	25	0	0	1	0	0	1	0	0	0	0	0	0	0	1
12	1	6	5	0	3	1	1	0	1	17	2	0	1	0	3	0	1	0	0	1	0	0	0	0
13	1	5	3	1	3	2	4	0	0	18	1	0	0	0	0	1	0	0	0	0	0	0	2	1
14	1	8	3	3	6	2	4	0	0	26	0	1	1	0	0	1	0	0	0	0	0	2	2	1
15	1	7	3	3	4	2	5	0	1	25	0	1	0	1	1	1	0	0	1	0	2	0	0	0
16	1	5	3	4	1	2	2	0	0	17	0	0	2	0	0	0	2	0	0	1	0	0	0	0
17	1	5	6	3	2	2	4	0	0	22	0	0	1	2	0	1	0	0	0	0	0	0	1	2
18	1	6	2	5	3	3	2	0	1	22	1	0	1	0	1	1	1	0	0	0	0	0	0	1
19	1	4	7	4	4	3	2	0	0	24	0	0	0	0	1	0	0	0	0	0	0	1	0	2
20	1	5	1	2	4	4	2	0	1	19	0	0	1	0	0	1	0	0	0	0	0	0	0	2
21	1	6	4	4	6	3	6	0	1	30	0	1	0	0	0	0	1	0	1	0	0	0	1	2
22	1	4	5	6	8	0	0	0	1	24	0	1	0	0	0	1	0	0	0	1	0	0	0	0
23	1	3	2	3	3	3	2	0	1	17	1	0	0	0	1	0	0	0	0	0	1	1	0	0
24	1	4	5	0	7	3	6	0	0	25	1	0	1	0	0	0	1	0	1	0	0	0	0	0
25	1	3	5	6	8	0	0	0	1	23	0	0	0	1	0	0	0	0	0	0	0	0	1	1
26	1	5	2	4	6	6	4	0	0	27	0	0	0	1	0	0	0	1	0	1	0	0	0	2
27	1	3	5	2	0	2	6	0	1	19	0	0	0	0	0	1	0	0	0	0	0	0	2	0
28	1	3	3	4	4	7	1	0	0	22	0	1	0	0	1	0	1	0	0	0	0	0	0	0
29	1	3	1	1	4	1	0	0	2	12	0	0	0	0	0	1	0	0	0	1	0	0	1	0
30	1	3	3	4	3	4	0	0	2	19	0	0	0	1	1	0	0	0	0	0	1	0	0	0
31	2	4	6	3	3	5	4	0	1	26	0	1	0	0	0	0	1	0	1	0	0	0	1	0
32	2	8	3	3	3	7	0	0	1	25	1	0	0	0	1	1	0	0	0	2	0	0	0	3
33	2	9	4	6	4	0	6	0	0	29	0	0	1	1	0	1	0	0	0	1	1	0	4	0
34	2	6	4	3	5	6	0	0	1	25	0	0	0	0	1	0	1	0	1	2	0	0	1	0
35	2	5	3	1	0	3	3	0	0	15	0	1	0	0	0	0	0	0	0	0	0	0	0	2
36	2	7	2	2	4	2	1	0	1	19	0	0	1	1	0	0	1	0	2	1	0	0	3	0
37	2	5	3	2	3	2	1	1	0	17	0	0	1	2	0	0	0	0	0	1	0	0	0	1
38	2	8	5	1	6	3	1	0	0	24	0	1	1	0	0	2	0	1	0	1	0	0	0	2
39	2	6	8	1	4	8	4	0	0	31	0	1	0	0	0	1	2	0	2	0	0	0	0	0
40	2	8	5	3	3	2	0	0	0	21	0	0	1	0	1	0	2	0	0	1	0	0	1	2
41	2	6	4	4	4	2	6	0	1	27	0	0	0	0	0	1	1	0	1	2	0	0	0	1
42	2	9	2	2	6	3	1	0	2	25	0	0	2	2	0	0	1	0	0	1	0	1	1	1
43	2	8	4	6	4	3	0	0	0	25	0	0	1	0	0	1	0	0	0	4	0	1	0	1
44	2	6	3	7	4	4	1	0	1	26	0	0	1	2	0	1	0	0	0	1	0	0	1	0
45	2	9	4	3	3	2	3	0	0	24	0	2	3	2	0	0	0	0	0	0	0	0	0	2
46	2	11	4	3	4	3	3	0	0	28	0	0	1	2	0	0	2	0	0	0	1	2	0	2
47	2	7	3	0	3	2	0	0	1	16	0	0	0	0	1	0	1	1	0	1	0	1	2	0
48	2	4	5	2	10	2	9	0	0	32	0	1	0	2	0	0	0	0	0	0	0	0	0	1
49	2	5	5	5	8	8	3	0	0	34	0	0	0	2	0	0	0	0	0	0	0	0	0	1
50	2	3	4	1	6	2	2	0	1	19	0	0	2	0	0	0	1	0	0	0	0	0	0	0
51	2	6	3	4	6	2	3	0	0	24	0	0	1	1	0	1	0	0	0	1	0	0	1	1
52	2	6	4	2	3	6	1	0	0	22	1	1	0	0	1	0	0	0	1	0	1	0	0	1
53	2	2	4	7	1	1	2	0	1	18	0	0	0	0	0	0	0	0	0	1	0	0	1	0
54	2	6	5	2	5	6	1	0	0	25	0	0	1	0	0	0	0	1	0	1	0	1	0	1
55	2	8	4	6	5	3	9	0	0	35	0	1	0	0	1	0	2	0	0	2	0	0	2	0
56	2	3	4	1	2	3	3	0	2	18	0	0	0	0	0	0	1	0	0	1	0	0	1	0
57	2	4	6	6	4	3	0	0	0	23	0	0	0	2	0	1	0	0	0	1	0	0	0	0
58	2	4	1	5	4	2	4	0	1	21	0	0	0	1	0	0	0	0	0	3	0	0	0	0
59	2	5	4	4	4	2	6	0	1	26	0	0	1	0	0	0	2	0	0	0	0	0	0	2
60	2	6	2	3	2	3	0	0	0	16	1	0	0	0	1	0	0	0	0	3	1	0	0	0
